# Supplementary material for: Heterogeneous azide–alkyne click chemistry: towards metal-free end products
Source: Royal Society of Chemistry journal article supplement (doi:10.1039/c2sc00848c), 2011-12-13
Supplement: c2sc00848c.pdf [file c2sc00848c.pdf]

## Supporting information

S Table S-1: Reaction conditions and results for a model click reaction of benzyl azide and phenylacetylene catalyzed by a heterogeneous copper catalyst.

| Solid support                                                 | <i>T</i> / °C    | Solvent                         | Excess        | Time / h       | Conv. / % | Cu-loading / mmol·g <sup>-1</sup> | Ref.  |
|---------------------------------------------------------------|------------------|---------------------------------|---------------|----------------|-----------|-----------------------------------|-------|
| Amberlyst <sup>a</sup>                                        | 25               | CH <sub>2</sub> Cl <sub>2</sub> | 1.1 (azide)   | 12             | 92        | 1.23                              | 14,15 |
| Amberlyst                                                     | 25               | -                               | 1.1 (azide)   | < 0.5          | 99        | 1.35                              | 17    |
| Amberlyst <sup>b</sup>                                        | N <sup>c</sup>   | CH <sub>2</sub> Cl <sub>2</sub> | 1.5 (azide)   | N <sup>c</sup> | 85        | 1.33                              | 18    |
| Cryogel                                                       | 25               | Acetone                         | 1.1 (alkyne)  | 5.5            | 95        | 0.12                              | 21    |
| Merrifield                                                    | 25               | tBuOH/H <sub>2</sub> O          | 1.1 (alkyne)  | 2.5            | 99        | 0.25                              | 22    |
| Merrifield <sup>e</sup>                                       | 25               | H <sub>2</sub> O                | 1.2 (alkyne)  | 48             | 98        | 1.25                              | 23    |
| TentaGel                                                      | 25               | tBuOH/H <sub>2</sub> O          | -             | 24             | 99        | 0.19                              | 24    |
| TentaGel                                                      | 40               | H <sub>2</sub> O                | 1.5 (azide)   | 6              | 87        | 0.26                              | 25    |
| HP20 <sup>d</sup>                                             | 25               | H <sub>2</sub> O                | 1.1 (alkyne)  | 6              | 100       | 0.16                              | 26    |
| PS-bead                                                       | 40               | DMF                             | 1.1 (azide)   | 8              | 90        | 0.04                              | 27    |
| PMEI network                                                  | 25               | EtOAc                           | 2.2 (alkyne)  | 0.7            | 99        | 0.41                              | 28    |
| Polymeric ionic liquid <sup>e</sup>                           | 25               | H <sub>2</sub> O                | 1.2 (alkyne)  | 48             | 98        | 1.00                              | 23    |
| PVP                                                           | 37               | H <sub>2</sub> O                | -             | 24             | 87        | N <sup>c</sup>                    | 29    |
| phenylethynylCu(I) ladder polymer                             | 100 <sup>e</sup> | H <sub>2</sub> O                | 2 (alkyne)    | 0.16           | 91        | 6.15                              | 31    |
| Isonitrile complex                                            | 25               | H <sub>2</sub> O                | 1.05 (alkyne) | 0.08           | 94        | N <sup>c</sup>                    | 32    |
| Metal organic framework                                       | 70               | Ethanol                         | 1.2 (alkyne)  | 4              | 99        | 4.16                              | 33    |
| Alginate                                                      | 25               | H <sub>2</sub> O                | 1.1 (alkyne)  | 18             | 98.2      | 0.21 <sup>f</sup>                 | 34    |
| Chitosan                                                      | 25               | EtOH                            | 1.1 (alkyne)  | 18             | 95        | 0.6                               | 36    |
| Chitosan                                                      | 70               | H <sub>2</sub> O/dioxane (8/2)  | -             | 0.5            | 86        | 0.17                              | 37    |
| Silica                                                        | 25               | -                               | -             | 0.5            | 93        | 0.87                              | 38    |
| Silica                                                        | 40               | DMF                             | 1.1 (azide)   | 8              | 84        | 0.05                              | 27    |
| Silica <sup>e</sup>                                           | 25               | H <sub>2</sub> O                | 1.2 (alkyne)  | 48             | 98        | 1.25                              | 23    |
| Silica <sup>e</sup>                                           | 78               | EtOH                            | -             | 24             | 91        | 0.43                              | 39    |
| Silica <sup>e</sup>                                           | 25               | H <sub>2</sub> O                | -             | 0.25           | 92        | 0.55                              | 40    |
| Silica <sup>h</sup>                                           | 25               | -                               | -             | 3              | 96        | 0.38                              | 41    |
| Silica                                                        | 25               | CH <sub>3</sub> CN              | 1.1 (azide)   | 12             | 81        | 0.45                              | 42    |
| Fe <sub>3</sub> O <sub>4</sub> /SiO <sub>2</sub> <sup>h</sup> | 25               | -                               | -             | 15             | 99        | 1.29                              | 41    |
| Silica                                                        | 25               | EtOH/H <sub>2</sub> O           | 1.35 (alkyne) | 1.5            | 98        | 0.15                              | 43    |
| Al <sub>2</sub> O <sub>3</sub>                                | 25               | Toluene                         | -             | 7              | 98        | 0.151                             | 44    |
| TiO <sub>2</sub>                                              | 25               | Toluene                         | -             | 0.7            | 99        | 0.25                              | 45    |
| Cu-Mn spinel oxide <sup>i</sup>                               | 25               | CH <sub>3</sub> CN              | -             | 8              | 99        | N <sup>c</sup>                    | 46    |
| Montmorillonite                                               | 25               | CH <sub>2</sub> Cl <sub>2</sub> | 1.1 (azide)   | 18             | 99        | 0.72                              | 47    |

|                                    |                  |                                 |               |      |     |                |       |
|------------------------------------|------------------|---------------------------------|---------------|------|-----|----------------|-------|
| Hydrotalcite                       | 25               | CH <sub>3</sub> CN              | 1.2 (alkyne)  | 6    | 86  | N <sup>c</sup> | 49    |
| Zeolite                            | 25               | Toluene                         | 1.2 (alkyne)  | 15   | 83  | 4.39           | 52    |
| Zeolite <sup>g</sup>               | 90               | H <sub>2</sub> O                | -             | 15   | 90  | N <sup>c</sup> | 54    |
| Charcoal                           | 25               | Dioxane                         | -             | 10   | 99  | 1.01           | 59    |
| Charcoal <sup>b</sup>              | 170 <sup>c</sup> | Acetone                         | 1.08 (alkyne) | 1    | 99  | 1.38           | 20    |
| Charcoal <sup>g</sup>              | 100              | H <sub>2</sub> O                | -             | 0.6  | 91  | 1.57           | 62    |
| Charcoal <sup>g</sup>              | 25               | CH <sub>2</sub> Cl <sub>2</sub> | 2 (azide)     | 18   | 95  | 1.83           | 63    |
| Charcoal                           | 60               | Dioxane                         | 1.1 (alkyne)  | 0.3  | 99  | 0.56           | 64    |
| Activated carbon <sup>g</sup>      | 70               | H <sub>2</sub> O                | -             | 3    | 98  | 0.25           | 65    |
| Acetylene black                    | 50               | tBuOH/H <sub>2</sub> O          | 1.4 (alkyne)  | 5    | 100 | N <sup>c</sup> | 66    |
| Carbon nanotubes <sup>g</sup>      | 25               | H <sub>2</sub> O                | 1.1 (alkyne)  | 0.8  | 95  | 0.55           | 67    |
| - <sup>g, j</sup>                  | 115              | DMF/ H <sub>2</sub> O           | 2 (azide)     | 0.7  | 64  | N <sup>c</sup> | 70    |
| -                                  | 25               | H <sub>2</sub> O/tBuOH          | 2 (alkyne)    | 18   | 80  | N <sup>c</sup> | 71    |
| - <sup>h</sup>                     | 25               | H <sub>2</sub> O/tBuOH          | -             | 2    | 92  | N <sup>c</sup> | 72    |
| -                                  | 65               | THF                             | -             | 0.17 | 98  | N <sup>c</sup> | 73-74 |
| PVP                                | 25               | Formamide                       | -             | 0.33 | 91  | N <sup>c</sup> | 77    |
| PVP                                | 25               | H <sub>2</sub> O/ionic liquid   | -             | 0.3  | 89  | N <sup>c</sup> | 78    |
| Al <sub>2</sub> O <sub>3</sub>     | 25               | H <sub>2</sub> O                | -             | 3    | 92  | 10.9           | 79    |
| AlO(OH)                            | 25               | Hexane                          | 1.1 (azide)   | 6    | 94  | 0.62           | 80    |
| Cu flow reactor <sup>b, g, k</sup> | 150              | DMF                             | 2 (azide)     | 0.08 | 72  | N <sup>c</sup> | 83    |

a. Propargyl phenol ether is used as an alkyne.

b. Continuous reaction.

c. Not available.

d. 3-Methyl-1-butyn-3-ol is used as an alkyne.

5 e. Microwave-assisted reaction.

f. Mmol Cu per 50 beads.

g. *In situ* generation of organic azide.

h. Propargyl alcohol is used as an alkyne.

i. Methyl propiolate is used as an alkyne.

10 j. 2-Bromoethanol is used as organic halide.

k. 4-Ethynyltoluene is used as an alkyne; ethyl iodide is used as organic halide.

Note on the table: This table presents only the reaction conditions and results for the model click reaction of benzylazide and phenylacetylene. The reader should be careful not only to look to this model reaction when comparing different solid supports, since the result can vary drastically in case that another type of azide or alkyne is used. Even in the case of the model click reaction, it is already difficult to compare the results because the experimental conditions can differ a lot.
